# Supplementary material
Source: publisher site journal article supplement (https://www.kjim.org/upload/media/kjim-2020-633-suppl4.pdf)
Supplement: Supplementary file 1 [file kjim-2020-633-suppl4.pdf]

**Supplementary Table 4. Factors associated with COVID-19 in patients with SLE**

| Variable                        | Unadjusted OR<br>(95% CI) | <i>p</i> value | Adjusted OR<br>(95% CI) | <i>p</i> value |
|---------------------------------|---------------------------|----------------|-------------------------|----------------|
| Age ≥ 50 years                  | 1.38 (0.49–3.93)          | 0.543          | 1.69 (0.54–5.26)        | 0.364          |
| Female sex                      | 0.80 (0.26–2.52)          | 0.708          | 0.76 (0.24–2.39)        | 0.634          |
| Comorbidities                   |                           |                |                         |                |
| Chronic lung disease            | 6.87 (0.60–79.22)         | 0.123          | 10.70 (0.78–146.03)     | 0.076          |
| Current medications             |                           |                |                         |                |
| Glucocorticoid                  | 1.27 (0.49–3.30)          | 0.618          |                         |                |
| Glucocorticoid dose ≥ 10 mg/day | 1.53 (0.59–3.97)          | 0.377          |                         |                |
| Hydroxychloroquine              | 0.54 (0.15–1.89)          | 0.334          |                         |                |
| Methotrexate                    | 1.33 (0.16–10.96)         | 0.790          |                         |                |

COVID-19, coronavirus disease 2019; SLE, systemic lupus erythematosus; OR, odds ratio; CI, confidence interval.
